# Supplementary material for: Understanding the Costs of Surgery: A Bottom-Up Cost Analysis of Both a Hybrid Operating Room and Conventional Operating Room
Source: PubMed Central journal article supplement (PMC9278478; doi:10.34172/ijhpm.2020.119), 2020-07-27
Supplement: ijhpm-11-299-s002.pdf [file ijhpm-11-299-s002.pdf]

**Supplementary 2.** Characteristics of Participating Hospitals

| Hospital | Number of beds | Number of ORs | Involved experts                                                                                                                                                                    |
|----------|----------------|---------------|-------------------------------------------------------------------------------------------------------------------------------------------------------------------------------------|
| A        | 212            | 12            | Anesthetist<br>Department building management<br>Financial department<br>Head of the OR<br>Staff involved in capacity measurements                                                  |
| B        | 766            | 22            | Head of the OR<br>Department building management<br>Board of directors<br>Staff involved in capacity measurements                                                                   |
| C        | 593 (2018)     | 20            | Head of the OR<br>Coordinator OR technology<br>Managing director OR department<br>Department building management<br>Financial department<br>Staff involved in capacity measurements |
| D        | 776 (n.d.)     | 14            | Clinical physicist<br>Medical technician<br>Staff involved in capacity measurements<br>Project manager OK                                                                           |
| E        | 630 (2017)     | 16            | Clinical physicist<br>Staff involved in capacity measurements<br>Technical coordinator<br>Coordinator surgery in the OR department                                                  |
