# Supplementary material for: Understanding the Costs of Surgery: A Bottom-Up Cost Analysis of Both a Hybrid Operating Room and Conventional Operating Room
Source: PubMed Central journal article supplement (PMC9278478; doi:10.34172/ijhpm.2020.119), 2020-07-27
Supplement: ijhpm-11-299-s003.pdf [file ijhpm-11-299-s003.pdf]

### Supplementary 3. Example of the calculation of the construction costs

The following formulas were mentioned in the article:

$$1 \quad \sum C_{M2 \text{ not labeled as OR}} = \sum M_{\text{functionality } i}^2 * C_{\text{differentiated } i}$$

$$2 \quad \frac{(\sum M_{\text{OR department}}^2 * C_{M2 \text{ costs OR department}}) - \sum C_{M2 \text{ not labeled as OR}}}{\sum M_{\text{OR within OR department}}^2}$$

This supplement gives an example of the construction cost calculation. The “C” in the formula refers to costs and the “M<sup>2</sup>” to square meters.

Picture 1 shows a simplified OR department containing corridors, ORs, a storage room, offices, the holding, the recovery and a place to have lunch and coffee.

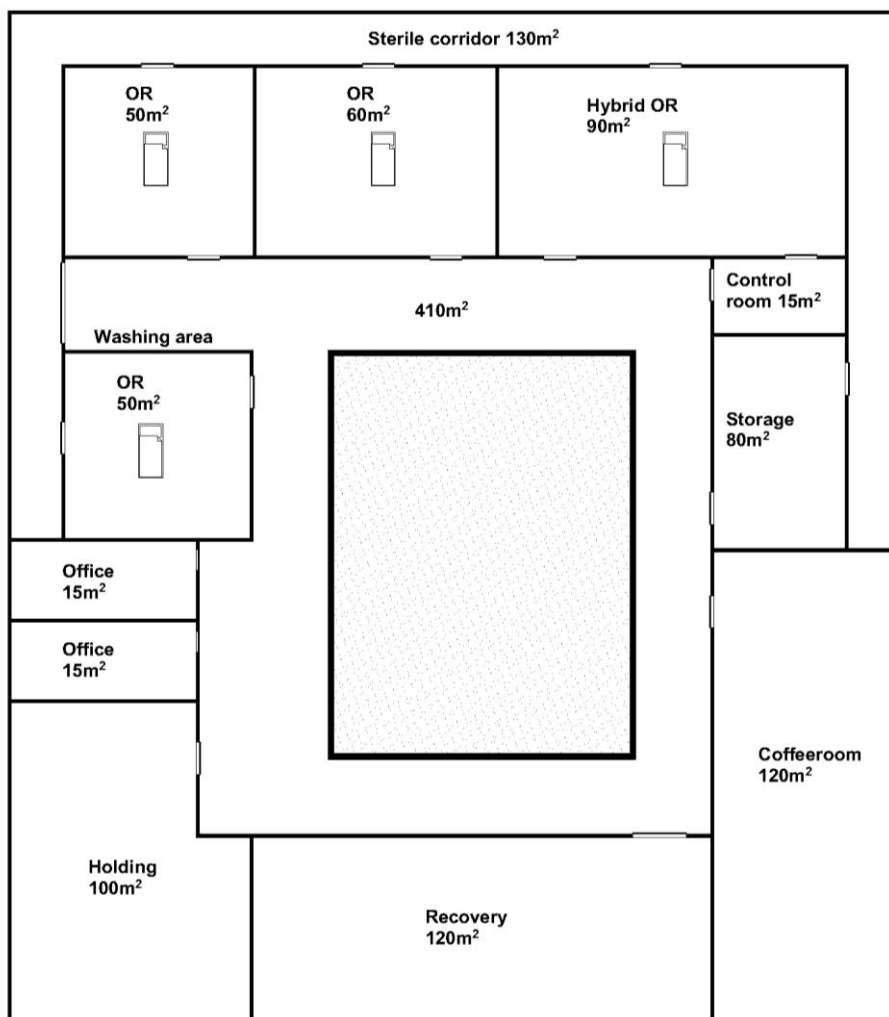

Picture 1

The total surface of this OR department is 1195m<sup>2</sup>.

Costs for constructing a m2 = €3479

Costs for constructing a m2 in an OR department = €5566 (differentiated with 160%)

The first part of the formula focuses on the surface of the OR department that is not belonging to the OR.

In this example that means: 30m2 office, 100m2 holding, 120m2 recovery, 120 m2 coffee room, 80m2 storage room, 410m2 standard corridor which sums up to: 860m2

The sterile corridor and control room were included in the surface belonging to the OR = 395m<sup>2</sup>.

$$1 \quad \sum C_{M2 \text{ not labeled as OR}} = \sum M_{functionality i}^2 * C_{differentiated i}$$

Filling in this formula gives the table below:

| $M_{functionality i}^2$ | Differentiated with | $(C_{differentiated i}) * M_{functionality i}^2$ |
|-------------------------|---------------------|--------------------------------------------------|
| Moffice = 30m2          | 100%                | = (3479 * 100%) * 30 = 104.370                   |
| Mholding = 100m2        | 140%                | = (3479 * 140%) * 100 = 487.060                  |
| Mrecovery = 120m2       | 140%                | = (3479 * 140%) * 120 = 584.472                  |
| Mcoffee room = 120m2    | 75%                 | = (3479 * 75%) * 120 = 313.110                   |
| Mstorage = 80m2         | 75%                 | = (3479 * 75%) * 80 = 208.740                    |
| Mcorridor = 410m2       | 75%                 | = (3479 * 75%) * 410 = 1.069.792                 |

|                                                       |
|-------------------------------------------------------|
| $\sum C_{M2 \text{ not labeled as OR}} = € 2.767.544$ |
|-------------------------------------------------------|

This number is used in the next formula

$$2 \quad \frac{(\sum M_{OR department}^2 * C_{M2 costs OR department}) - \sum C_{M2 \text{ not labeled as OR}}}{\sum M_{OR within OR department}^2}$$

Two of the four variables were given at the beginning:

M<sup>2</sup> OR department = 1195m<sup>2</sup>

M<sup>2</sup> costs of OR department = €5566

The final variable can be extracted from Picture 1:

m<sup>2</sup> of OR within OR department = + 50 + 60 + 90 + 15 + 130 = 395 m<sup>2</sup>

We can fill in the formula:

$$= ((1195 * 5566) - 2.767.544) / 395$$

$$= € 9832$$

In this example constructing a m<sup>2</sup> of an OR would cost €9832.
