# Supplementary material for: Understanding the Costs of Surgery: A Bottom-Up Cost Analysis of Both a Hybrid Operating Room and Conventional Operating Room
Source: PubMed Central journal article supplement (PMC9278478; doi:10.34172/ijhpm.2020.119), 2020-07-27
Supplement: ijhpm-11-299-s004.pdf [file ijhpm-11-299-s004.pdf]

**Supplementary 4.** Formulas to calculate the costs per OR

*In this analysis the formulas used to calculate the OR costs for both the hybrid and conventional OR were as follows:*

Costs of the OR per hour =

$$\frac{\text{Annual construction costs} + \text{annual inventory costs} + \text{annual overhead costs}}{\text{Utilization rate} * \text{available production hours of OR}}$$

*+hourly personnel costs*

Costs of the OR per minute =

$$\frac{\text{Costs of the OR per hour}}{60}$$
